# Supplementary material
Source: publisher site journal article supplement (https://www.dovepress.com/article/394366)
Supplement: Supplementary file 1 [file get_supplementary_file.php]

## Supplementary Figures

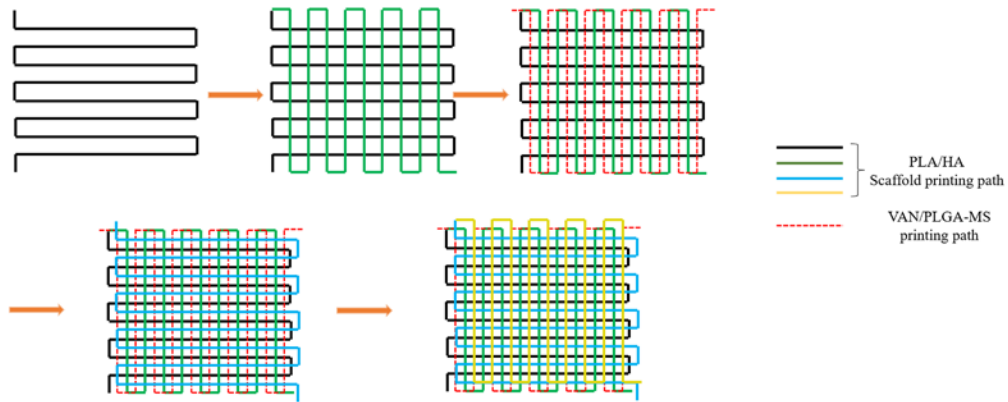

**Figure S1** The whole printing idea of VAN/MS-PLA/n-HA composite scaffolds.

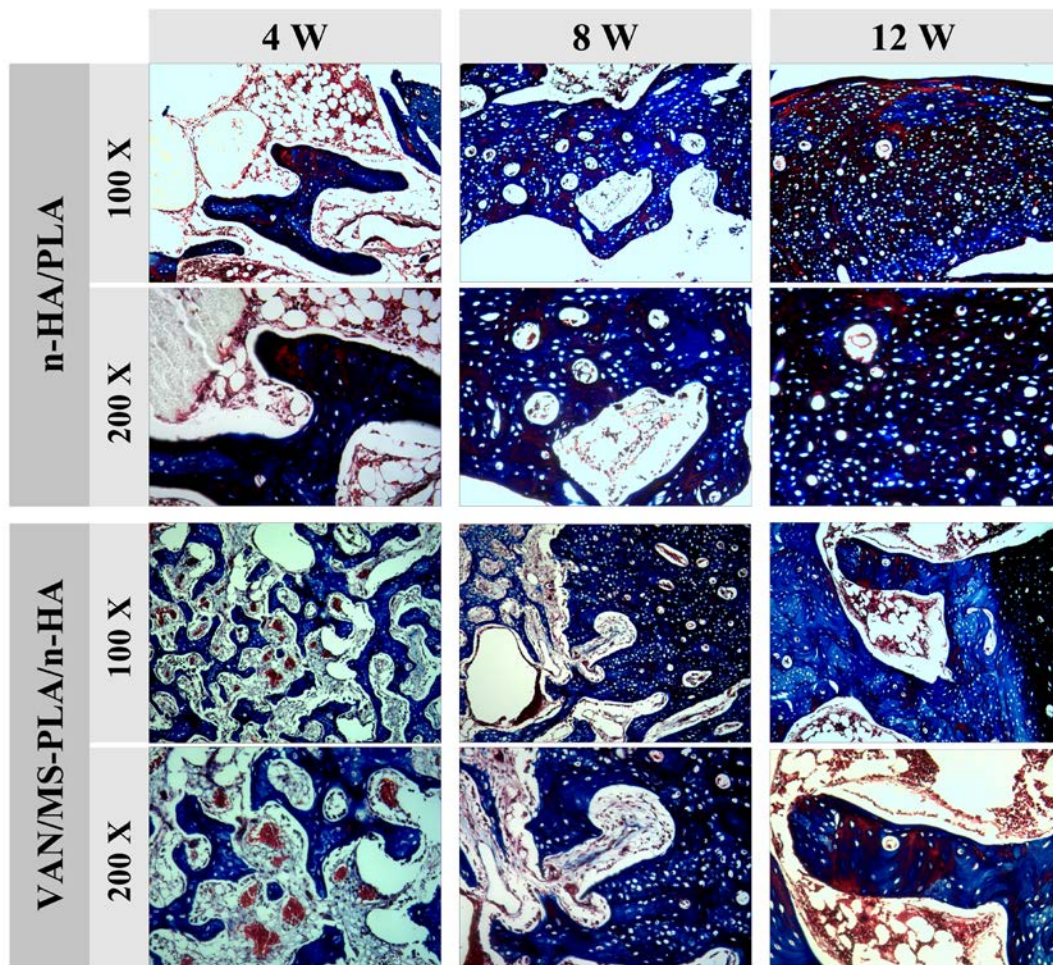

**Figure S2** Observation of Masson trichrome staining on the defect of femur in different scaffold groups at 4,8,12 weeks after operation.
